# Supplementary material for: Limited role of DWI with apparent diffusion coefficient mapping in breast lesions presenting as non-mass enhancement on dynamic contrast-enhanced MRI
Source: Springer Nature journal article supplement (doi:10.1186/s13058-019-1208-y), 2019-12-01

Additional File 2

**Figure A2:** ROC curves and AUC (in brackets) for the minimum, mean and maximum ADC of the Darkest Part of the Tumor 2D ROI segmentation approach.

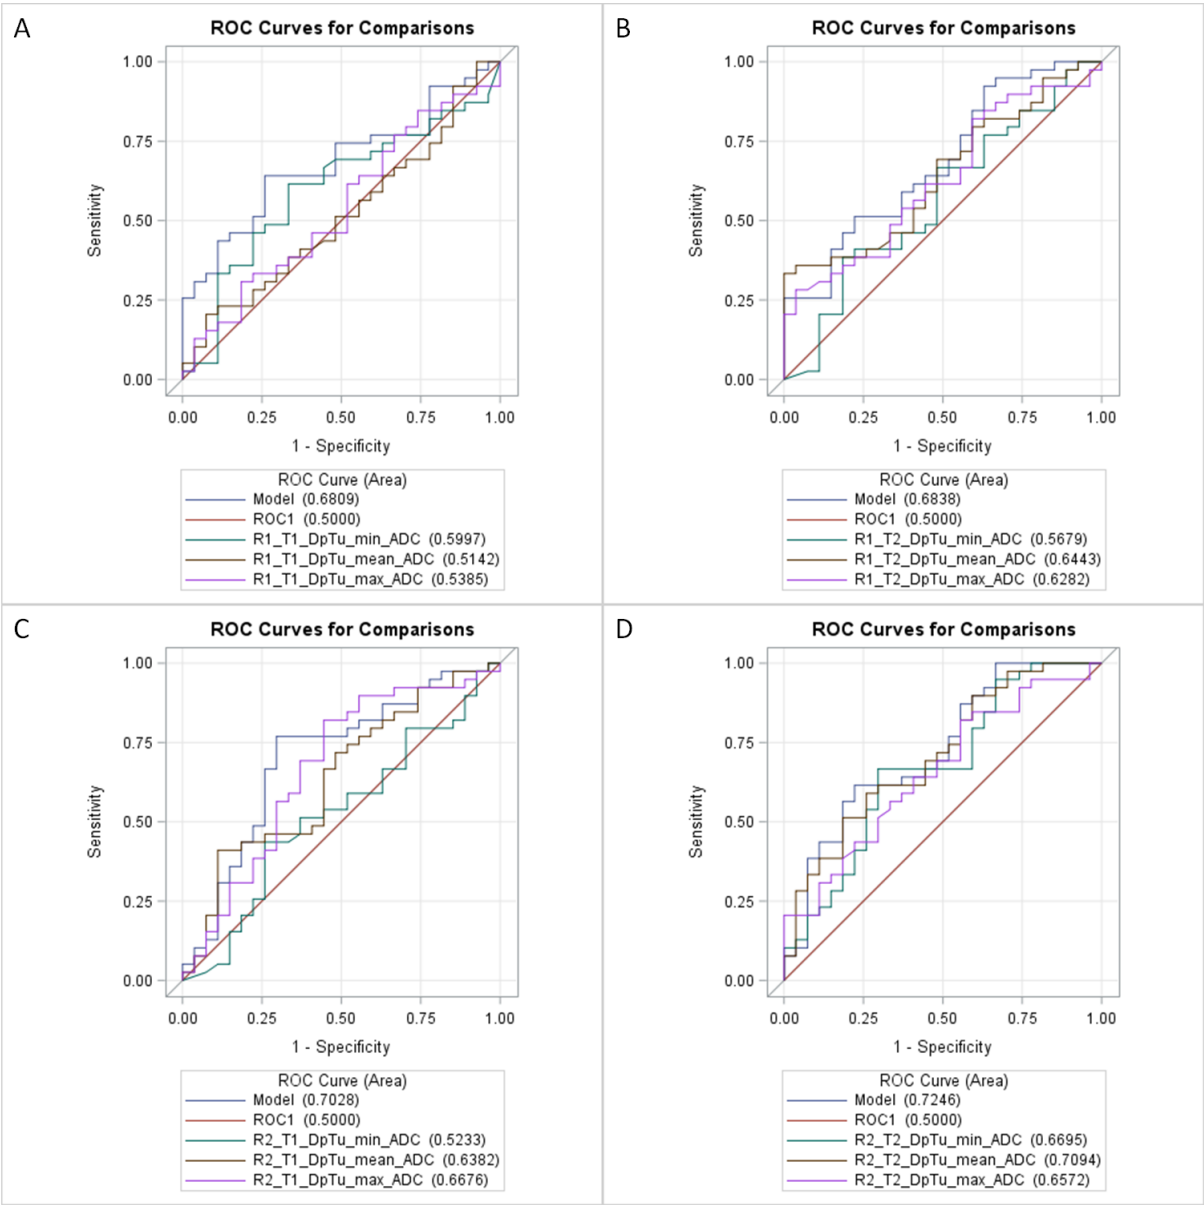

Supplement: MOESM2 [file 17469218]
