# Supplementary material for: Limited role of DWI with apparent diffusion coefficient mapping in breast lesions presenting as non-mass enhancement on dynamic contrast-enhanced MRI
Source: Springer Nature journal article supplement (doi:10.1186/s13058-019-1208-y), 2019-12-01

## Additional File 6

**Figure A6:** Scatterplots of concordance correlation coefficients between reader 1 and reader 2 at Time 1 and at Time 2 regarding Point Tumor (Ptu) apparent diffusion coefficient (ADC) mean (A,B).

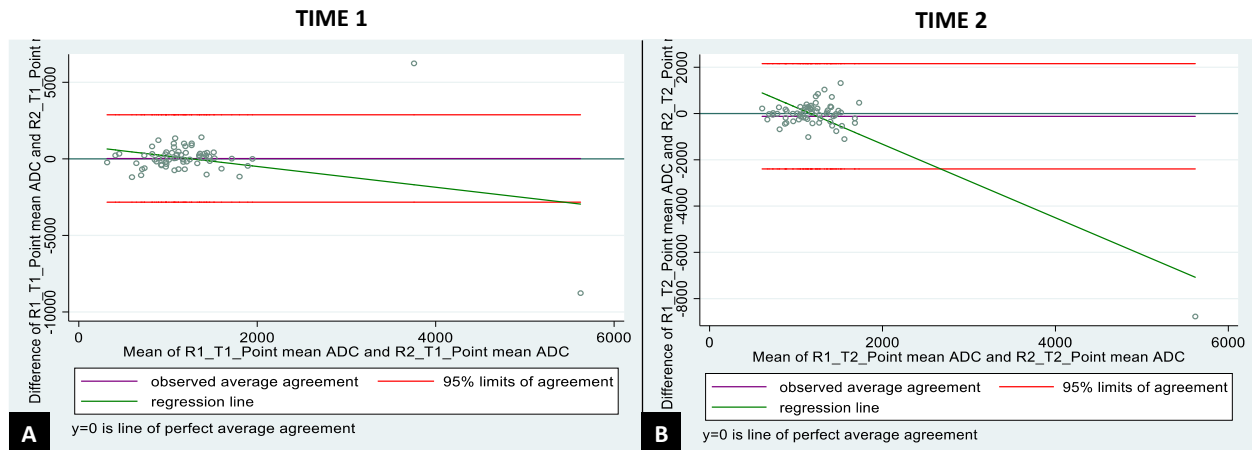

Supplement: MOESM6 [file 17469218]
